# Supplementary material for: Chiral separation of diastereomers of the cyclic nonapeptides vasopressin and desmopressin by uniform field ion mobility mass spectrometry
Source: Royal Society of Chemistry journal article supplement (doi:10.1039/c8cc03790f), 2018-01-01
Supplement: c8cc03790f1.pdf [file c8cc03790f1.pdf]

**Supporting Information**

**Chiral Separation of Diastereomers of the Cyclic Nonapeptides  
Vasopressin and Desmopressin by Uniform Field Ion Mobility  
Mass Spectrometry**

Shawn T. Phillips, James N. Dodds, Berkley M. Ellis, Jody C. May, and John A. McLean\*

Department of Chemistry, Center for Innovative Technology, Vanderbilt Institute of Chemical  
Biology, and Vanderbilt Institute for Integrative Biosystems Research and Education, Vanderbilt-  
Ingram Cancer Center, Vanderbilt University, Nashville, TN 37235-1822

\*Corresponding Author Email: [john.a.mclean@vanderbilt.edu](mailto:john.a.mclean@vanderbilt.edu)

# Supplemental Material

| Nonapeptide               |       | Ion Form           | Mass (Da) | <sup>DT</sup> CCS <sub>N<sub>2</sub></sub> (Å <sup>2</sup> ) | <sup>DT</sup> CCS <sub>He</sub> (Å <sup>2</sup> ) |
|---------------------------|-------|--------------------|-----------|--------------------------------------------------------------|---------------------------------------------------|
| 8L-Vasopressin - A<br>- B | 8L-VP | [M+H] <sup>+</sup> | 1084      | 302.2 ± 0.2<br>310.4 ± 0.6                                   | 219 ± (0.9)<br>224 ± (1.4)                        |
| 8D-Vasopressin            | 8D-VP | [M+H] <sup>+</sup> | 1084      | 309.8 ± 0.2                                                  | 226 ± (1.1)                                       |
| 8L-Desmopressin           | 8L-DP | [M+H] <sup>+</sup> | 1069      | 307.8 ± 0.5                                                  | 225 ± (1.2)                                       |
| 8D-Desmopressin           | 8D-DP | [M+H] <sup>+</sup> | 1069      | 314.4 ± 0.4                                                  | 230 ± (1.1)                                       |

**Table S1:** A summary of the drift tube CCS measurements obtained in this study. The nitrogen values in this table correspond to three replicate measurements (N=3) from separate days. Helium measurements were from a single set of experiments (uncertainty given in parenthesis corresponds to the variance of each of the seven electric fields sampled in the stepped field method). The x axis was converted from drift time to CCS in the main text using the single field method described in a recent publication from Stow *et. al.* (*Anal. Chem.* **2017**, 89, 9048-9055).

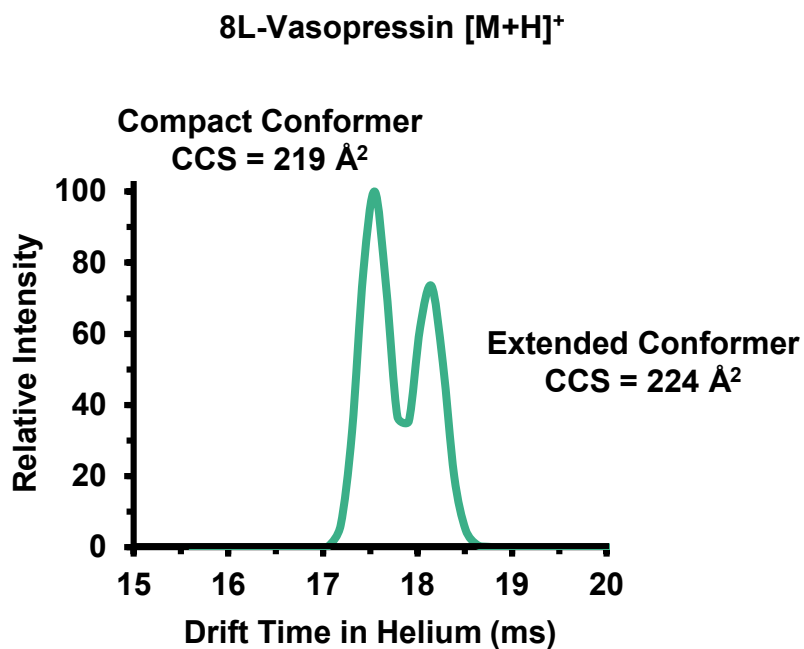

**Supplemental Figure S1:** Drift time distributions for singly-protonated 8L-vasopressin obtained when conducting the IM separation in helium drift gas. A with nitrogen drift gas (Figure 2B of the main text), two distinct conformational populations are observed in helium. These helium-based CCS measurements more closely align with the computational results.

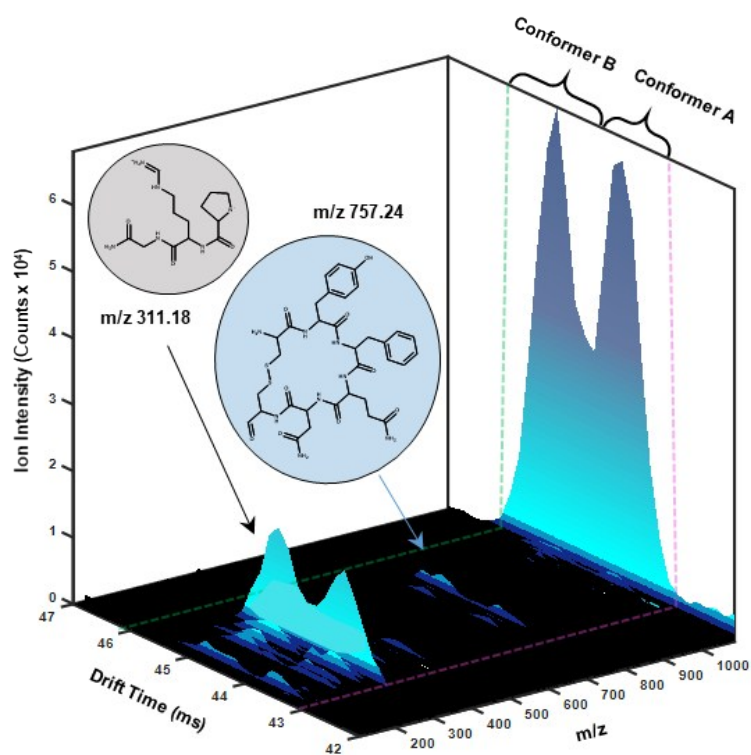

**Supplemental Figure S2:** Ion mobility-aligned fragmentation data for singly-protonated ( $[M+H]^+$ ) 8L-vasopressin obtained using post IM collision-induced dissociation (i.e., IM/MS). Both conformers have the same fragmentation spectra, including fragment ion masses and relative abundances (c.f., Figure S2), providing increased confidence that both distributions at  $m/z$  1084 are from the same parent ion, as opposed to a contaminant ion signal.

## Supplemental Material

### Mobility Selected CID of Vasopressin Diastereomers

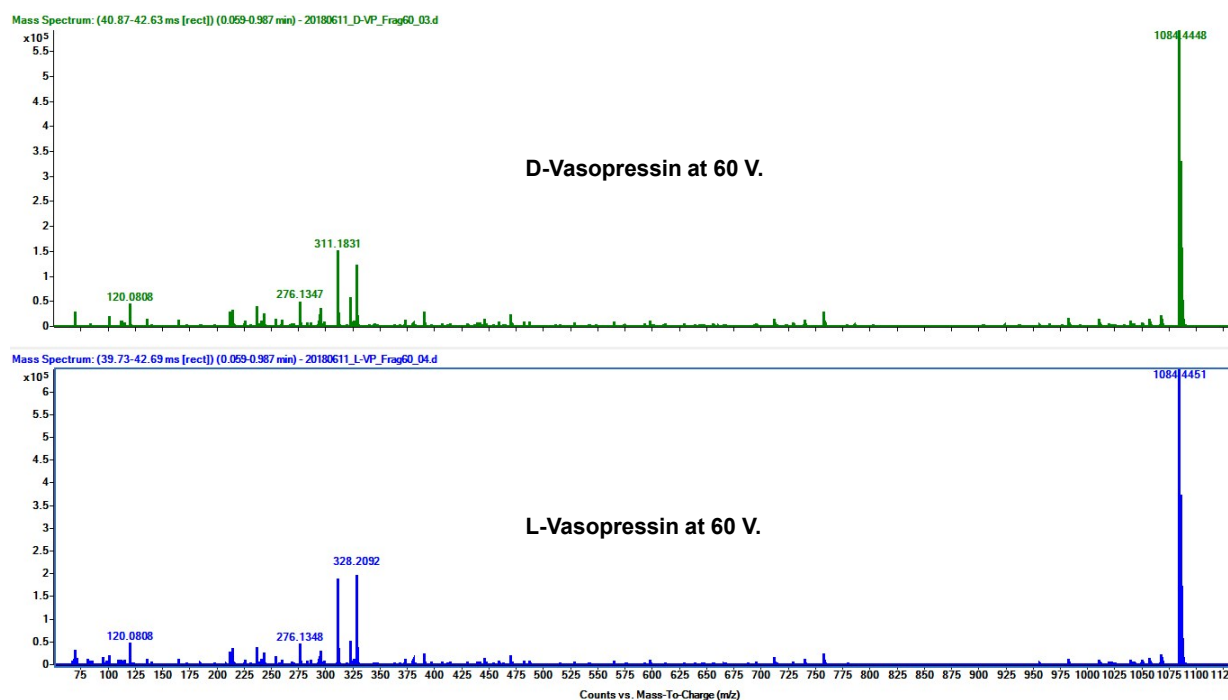

**Supplemental Figure S3:** Mobility selected mass spectra for 8D- (Top) and 8L- (Bottom) vasopressin diastereomers for 60 V (laboratory frame) CID. While both stereoisomers have the same fragmentation spectra, and hence does not eliminate the possibility of some “D” vasopressin as a contaminant in “L” VP from the manufacturer, this information provides additional confidence that the secondary conformer is not an unrelated molecule with the same molecular formula as 8L-VP.

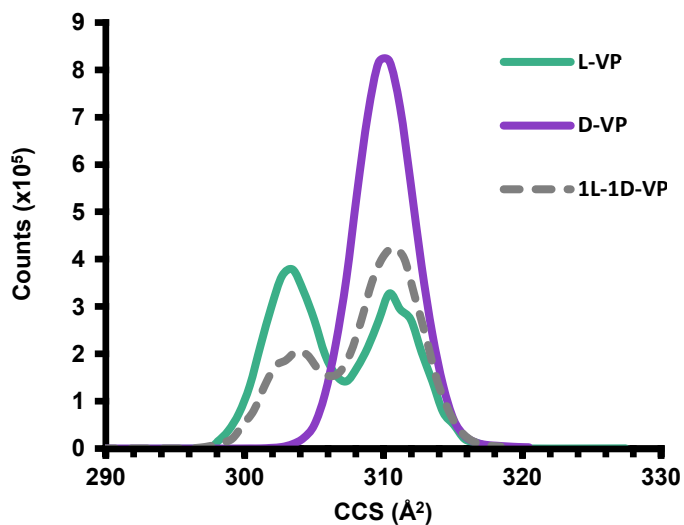

**Supplemental Figure S4:** Ion mobility spectra for the protonated  $[M+H]^+$  Vasopressin diastereomers (L and D) in addition to a 1:1 mixture (gray dashed trace). The IM distribution for 8D-VP and the larger conformer of 8L-VP have essentially the same measured CCS. As more 8D-VP is added to a solution of 8L-VP (see gray trace), the distribution at higher CCS (*ca.* 310 Å<sup>2</sup>) increases in abundance in comparison to the distribution of 8L-VP at lower CCS (*ca.* 304 Å<sup>2</sup>). This observation helps support the claim that the two peaks observed for 8L-VP originate solely from the 8L-VP sample.

# 8L-Vasopressin [M+H]<sup>+</sup>

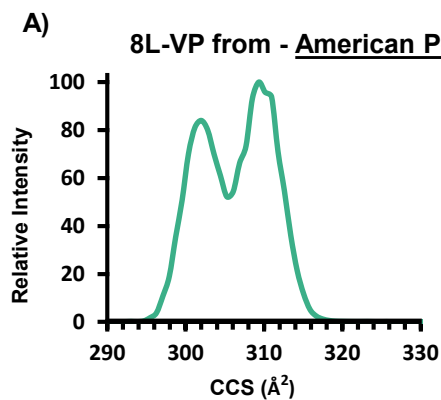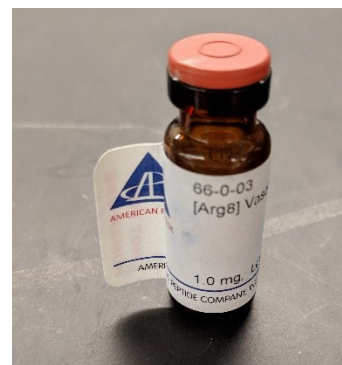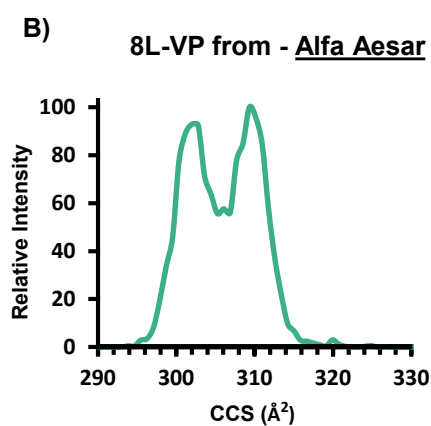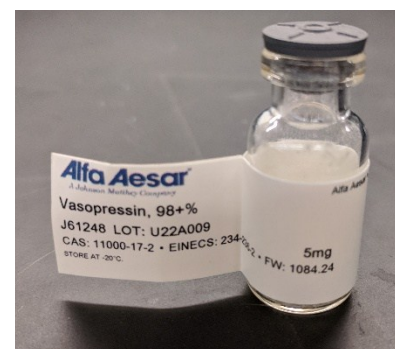

**Supplemental Figure S5:** To check the analytical purity of 8L-VP obtained from American Peptide (**A**) due to presence of two conformations (one of which possesses a similar CCS to the CCS distribution of 8D-VP), a second pure chemical standard of 8L-VP was purchased from a separate chemical vendor (Alfa Aesar, **B**). The spectra from both vendors have identical ion mobility distributions, and hence contamination of 8L-VP with quantities of 8D-VP is unlikely.

**Supplemental Figures S6 & S7:** To confirm enantiomeric purity of 8L-VP and to ensure the ion mobility distributions of Figure 2B arise solely from multiple gas phase conformations, rotating-frame nuclear Overhauser effect correlation spectroscopy (ROESY) was performed. The  $^1\text{H}$  NMR spectra for both 8L-VP and 8D-VP were obtained on a Bruker 600 MHz NMR spectrometer equipped with a 5mm TXI cryogenically cooled NMR probe for enhanced sensitivity. The  $^1\text{H}$  spectra were acquired with 128 scans to achieve maximum signal to noise ratio and the resulting spectra indicated pure analytical standards with no indication of contaminants or signs of a mixture (Figure S6). In order to examine the explicit differences in stereochemistry between 8L and 8D vasopressin, the proton corresponding to the stereocenter of the 8-arginine residue in  $^1\text{H}$  NMR region of 4.37 ppm (blue ovals), was further investigated by 1D Selective Gradient ROESY for both diastereomers in order to observe the through-space interactions (Figure S7, referenced from Sikorska *et. al.*, *J. Pept. Sci.* **2008**, *14*, 76-84). After normalization of the excitation peak, each vasopressin diastereomer had different relative intensities for peaks showing nuclear Overhauser effect (NOI

8-arg  
L- an

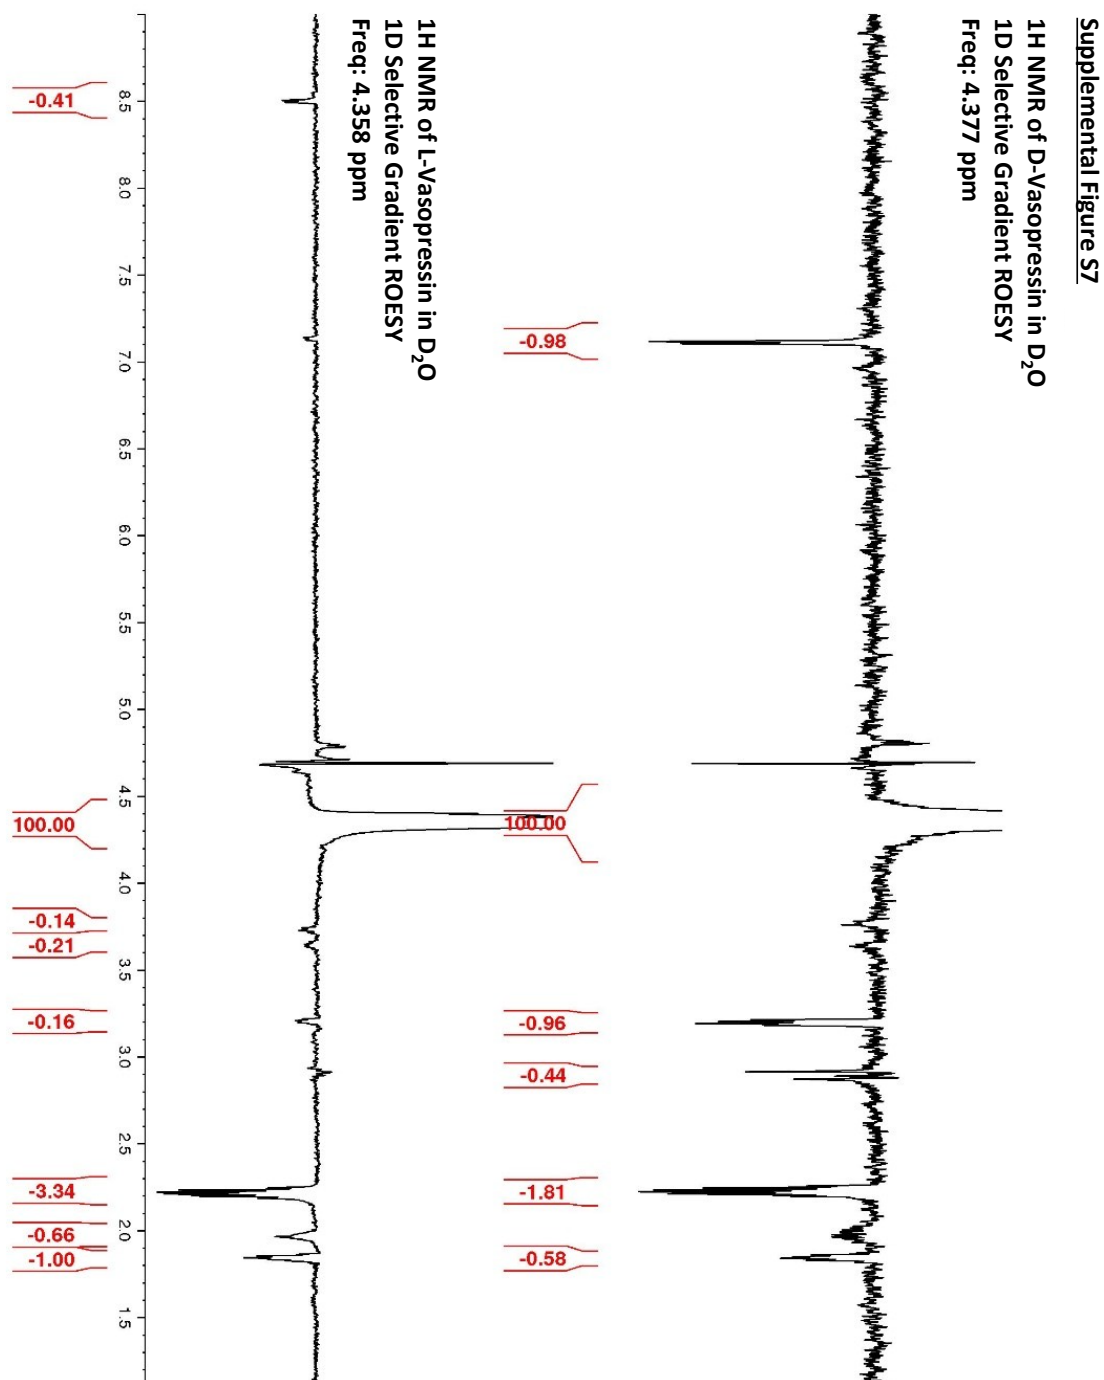



**(A) 8D-DP: One Main Family**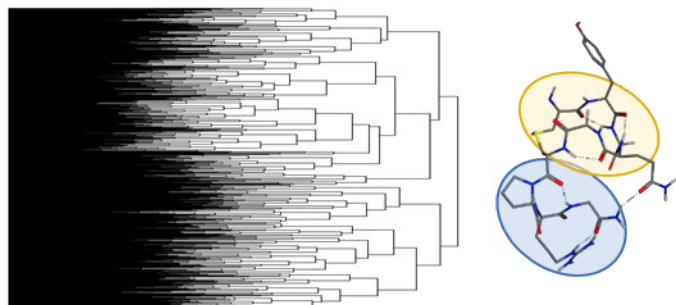**(B) 8L-VP: Two Families**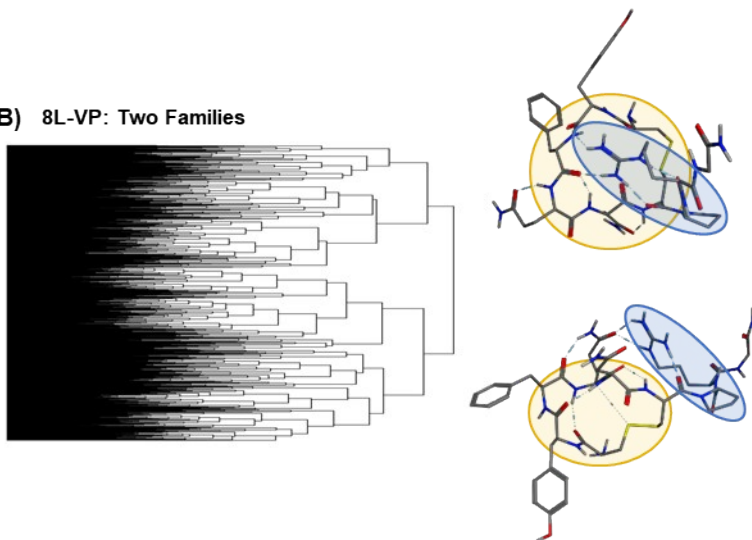

**Supplemental Figure S8:** RMSD clustering analysis performed on the 3,000 computationally-generated structures for each isomer. **(A)** 8D-Vasopressin exhibits one dominant family, while **(B)** 8L-Vasopressin has two main families. Representative low-energy structures are shown for each clustered structural population.

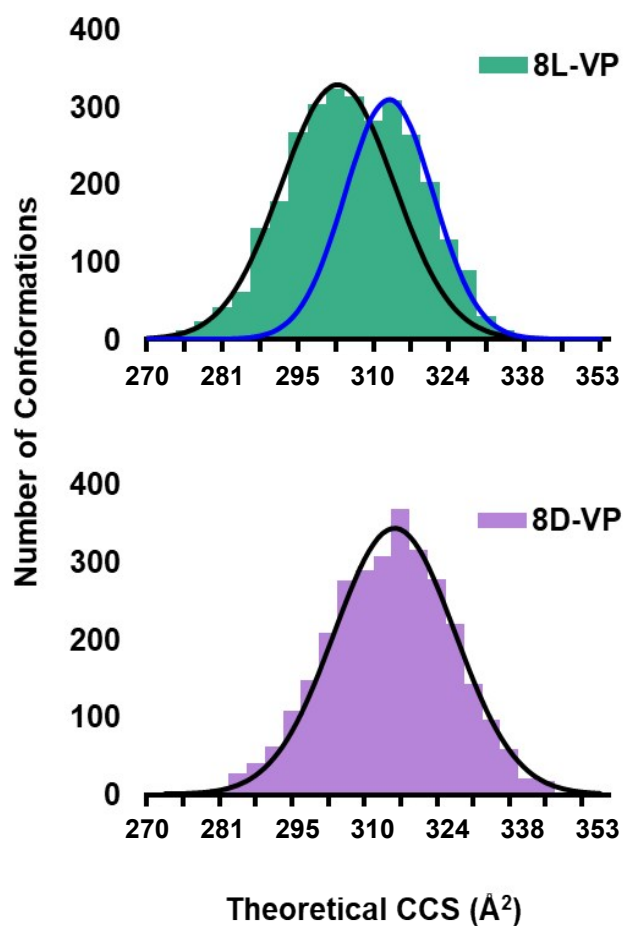

**Supplemental Figure S9:** Distribution of theoretical structures based on the calculated CCS. Here, normal distributions are overlaid across the histograms to illustrate that two structural families were observed for 8L-VP whereas only one primary structural family at higher CCS is observed for 8D-VP.
